# Supplementary material
Source: ML conference proceedings conference paper supplement (https://aclanthology.org/2024.trustnlp-1.16)
Supplement: SupplementaryMaterial [file 2024.trustnlp-1.16.SupplementaryMaterial.zip]

Archive with 1 entries (1 files):
- NAACL_TrustNLP_GenCeption_Examples.pdf
