# Supplementary material
Source: ML conference proceedings conference paper supplement (https://aclanthology.org/2024.trustnlp-1.16)
Supplement: SupplementaryMaterial [file 2024.trustnlp-1.16.SupplementaryMaterial.zip › NAACL_TrustNLP_GenCeption_Examples.pdf]

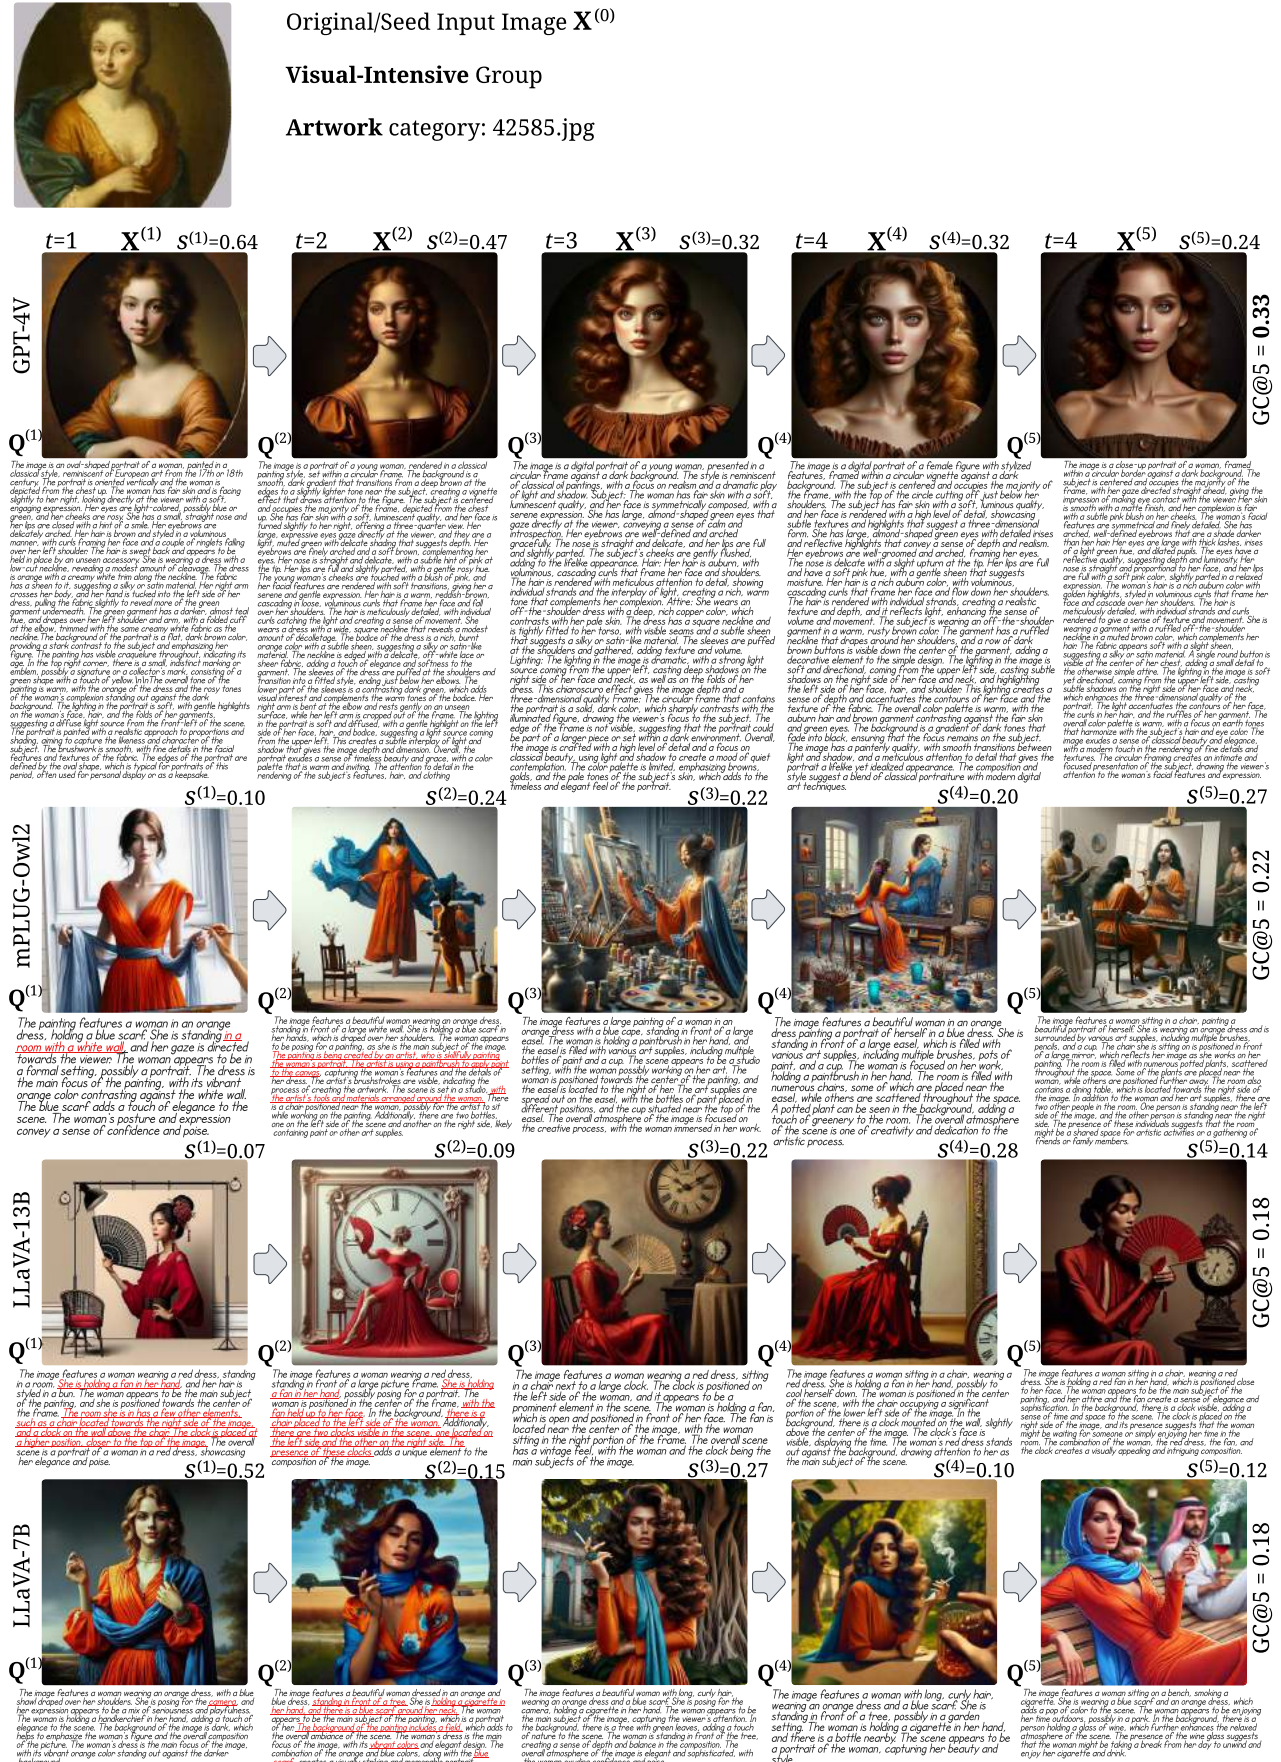

Original/Seed Input Image  $X^{(0)}$

Visual-Intensive Group

Celebrity category: tt0082971\_shot\_0831\_img\_0.jpg

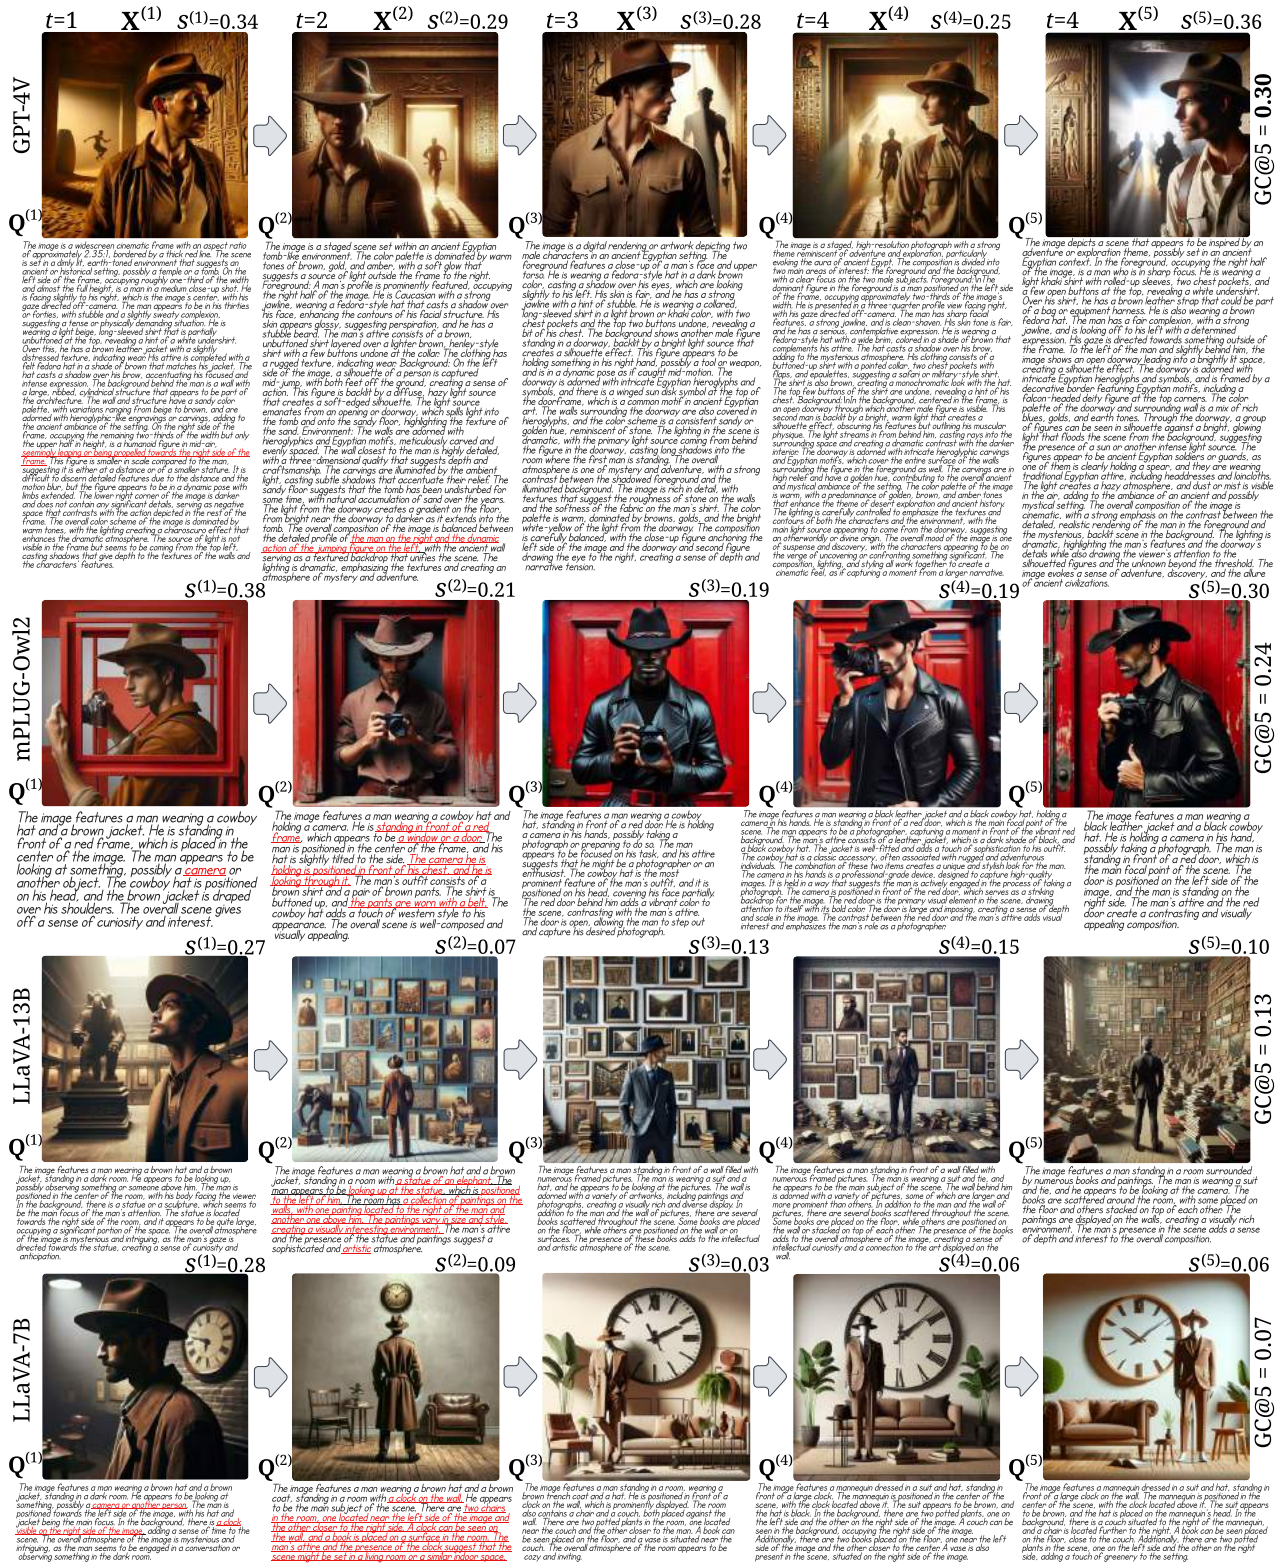

Figure 2: Illustration of a 5-iteration GenCepion procedure run on celebrity images to evaluate 4 VLLMs. Each iteration  $t$  shows the generated image  $X^{(t)}$ , the description  $Q^{(t)}$  of the preceding image  $X^{(t-1)}$ , and the similarity score  $s^{(t)}$  relative to  $X^{(0)}$ . The GC@5 metric for each VLLM is also presented. Hallucinated elements within descriptions  $Q^{(1)}$  and  $Q^{(2)}$  as compared to the seed image are indicated with **red underlining**.

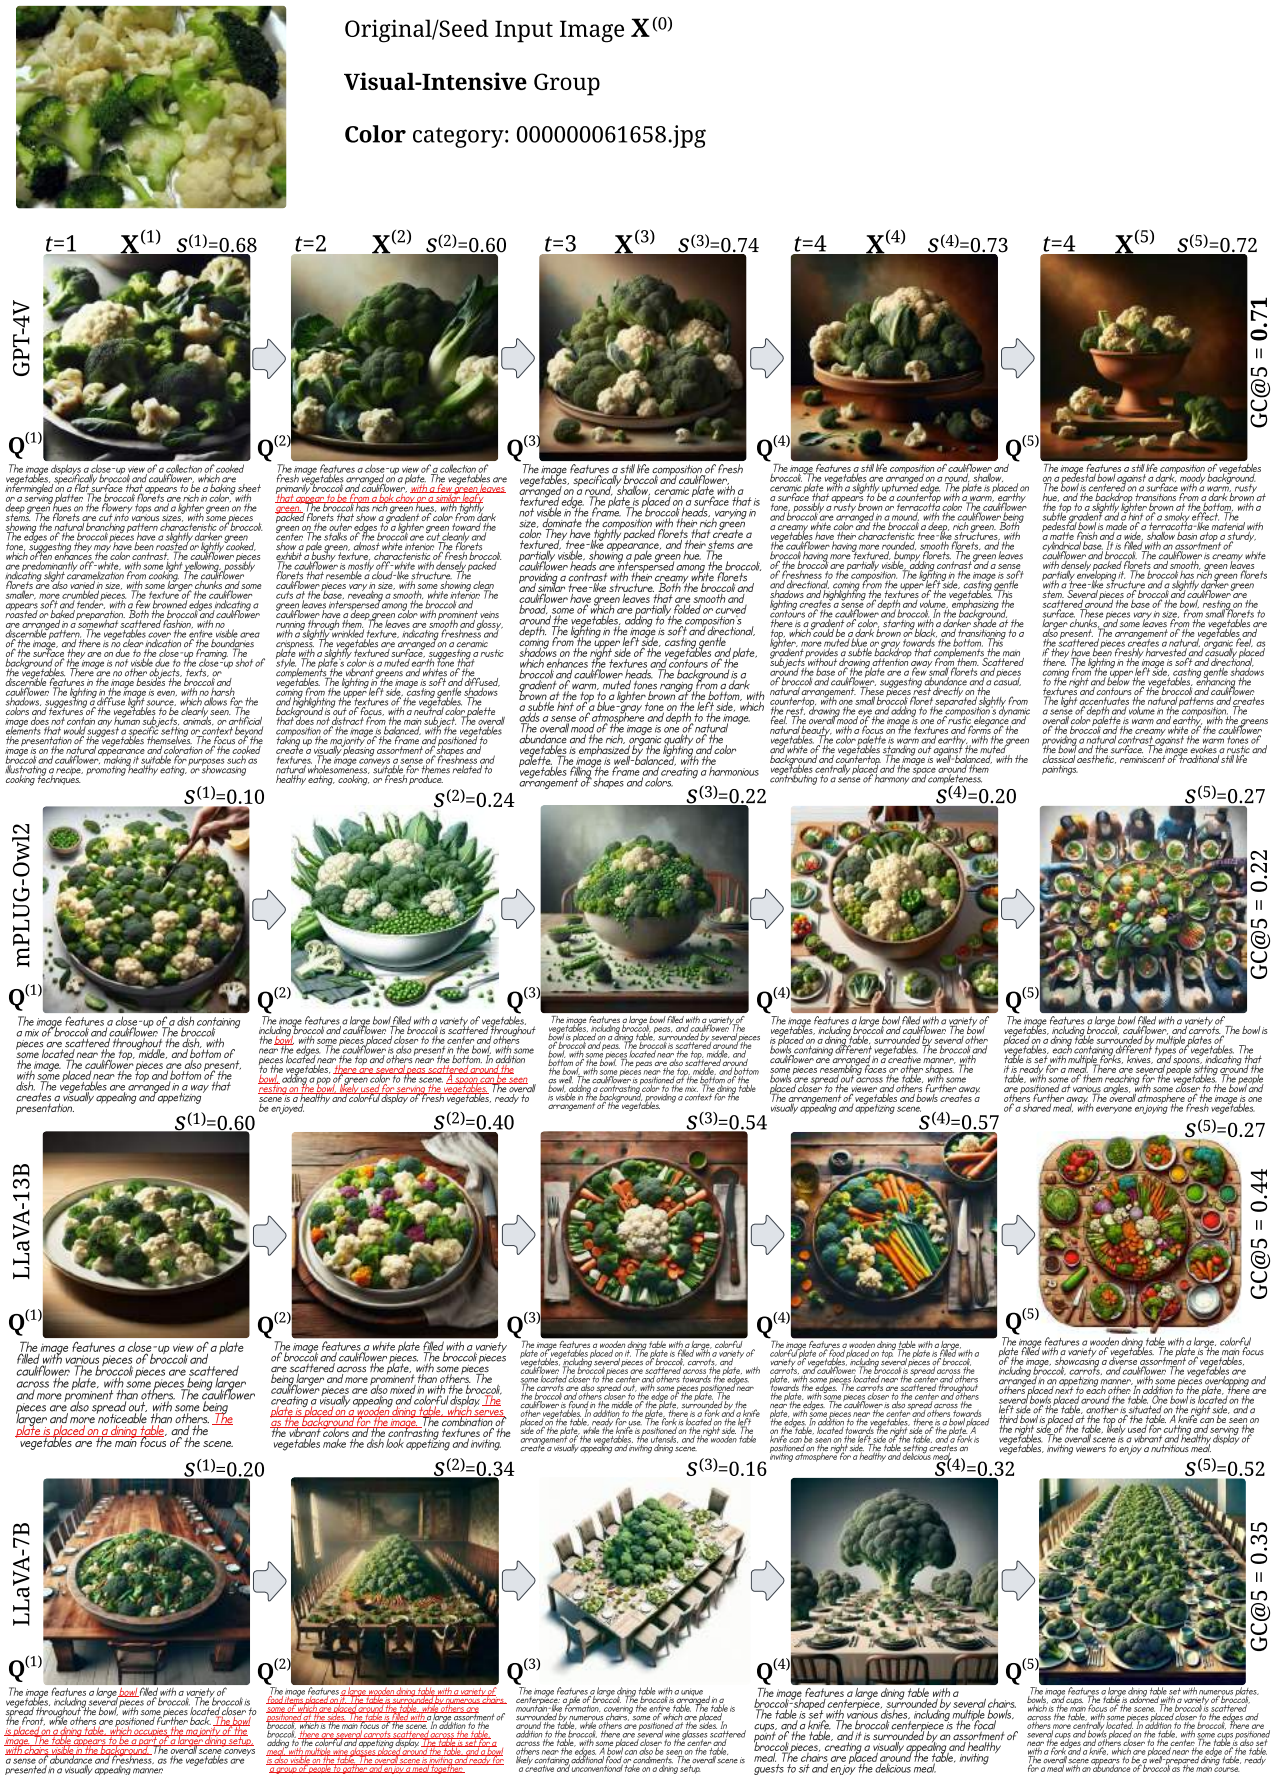

Figure 3: Illustration of a 5-iteration GenCepition procedure run on color images to evaluate 4 VLLMs. Each iteration  $t$  shows the generated image  $\mathbf{X}^{(t)}$ , the description  $\mathbf{Q}^{(t)}$  of the preceding image  $\mathbf{X}^{(t-1)}$ , and the similarity score  $s^{(t)}$  relative to  $\mathbf{X}^{(0)}$ . The GC@5 metric for each VLLM is also presented. Hallucinated elements within descriptions  $\mathbf{Q}^{(1)}$  and  $\mathbf{Q}^{(2)}$  as compared to the seed image are indicated with red underlining.

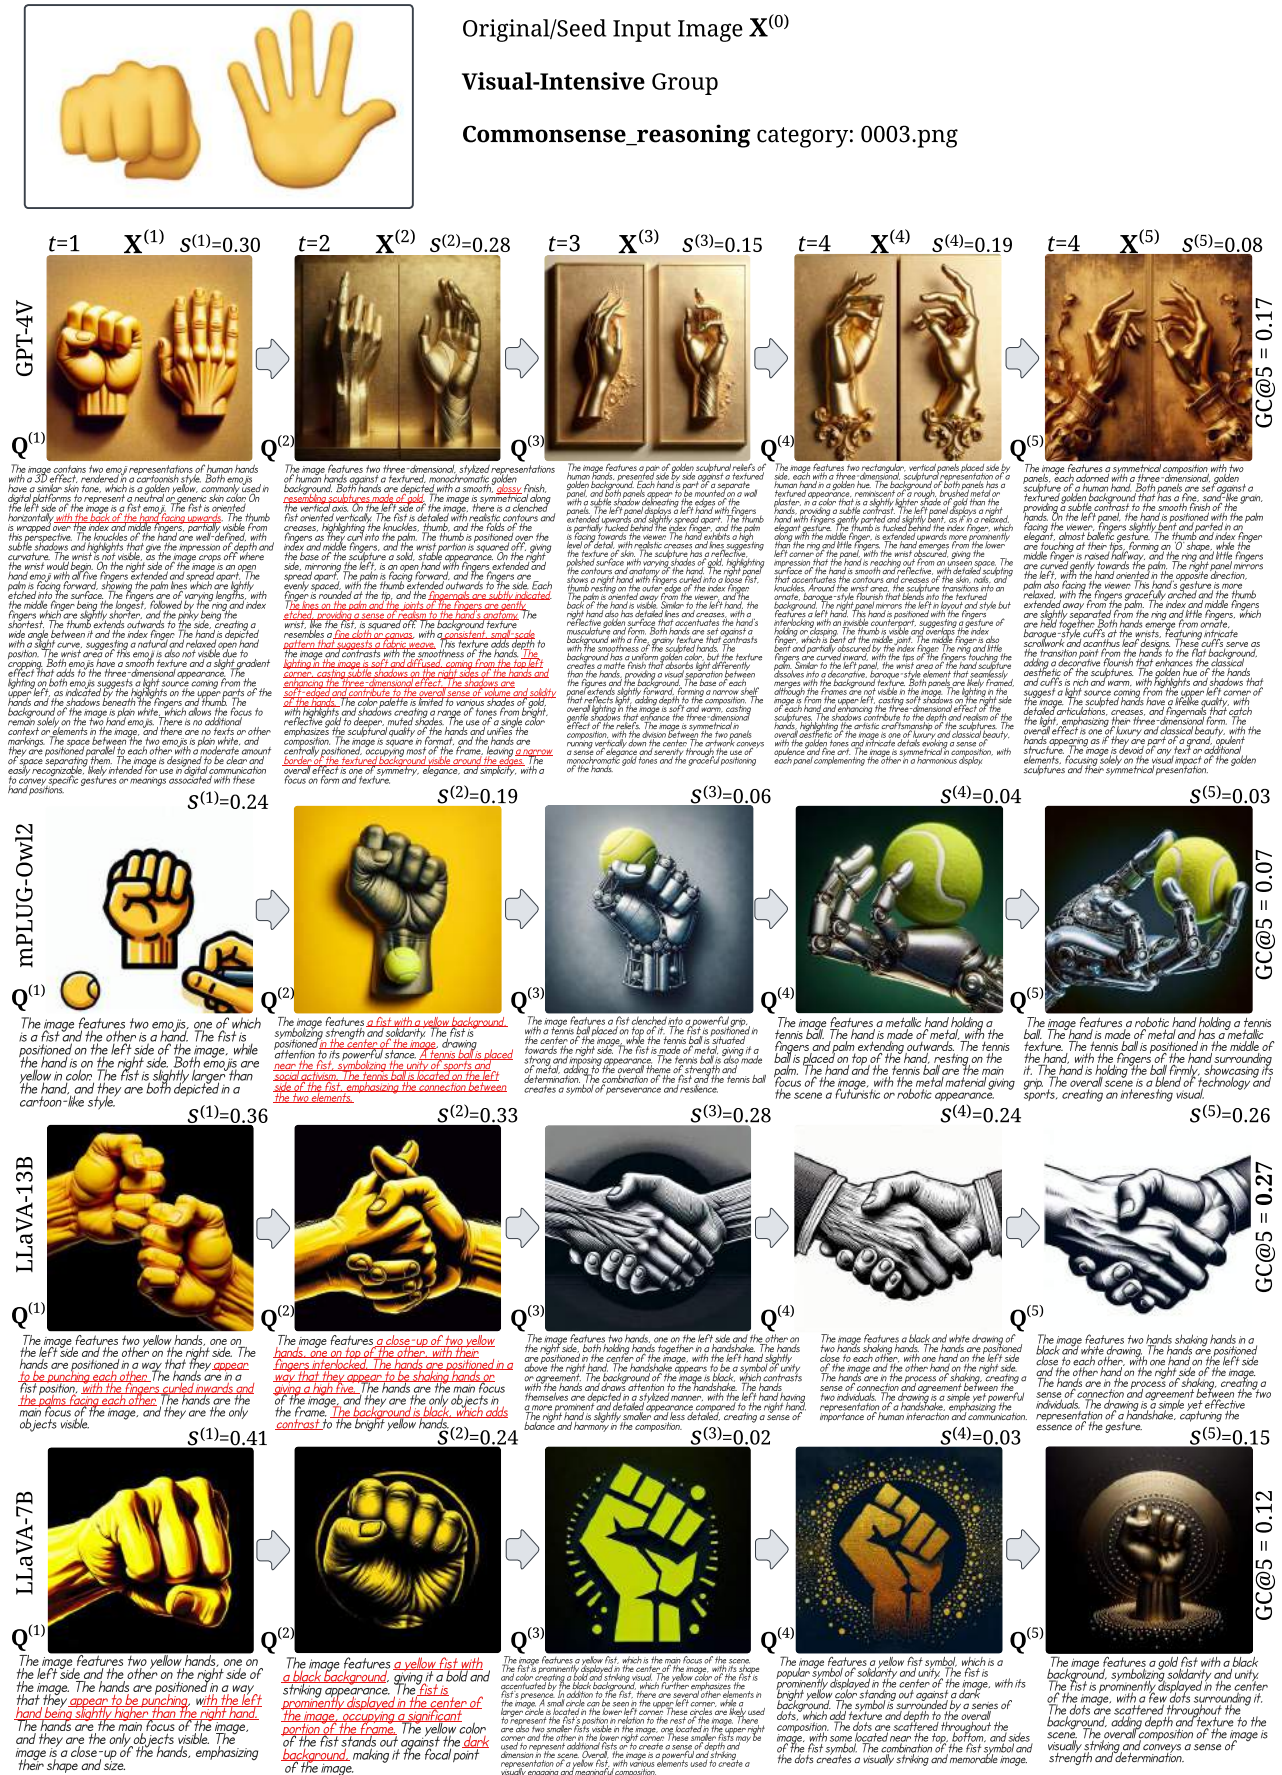

Figure 4: Illustration of a 5-iteration GenCepion procedure run on commonsense\_reasoning images to evaluate 4 VLLMs. Each iteration  $t$  shows the generated image  $X^{(t)}$ , the description  $Q^{(t)}$  of the preceding image  $X^{(t-1)}$ , and the similarity score  $s^{(t)}$  relative to  $X^{(0)}$ . The GC@5 metric for each VLLM is also presented. Hallucinated elements within descriptions  $Q^{(1)}$  and  $Q^{(2)}$  as compared to the seed image are indicated with red underlining.

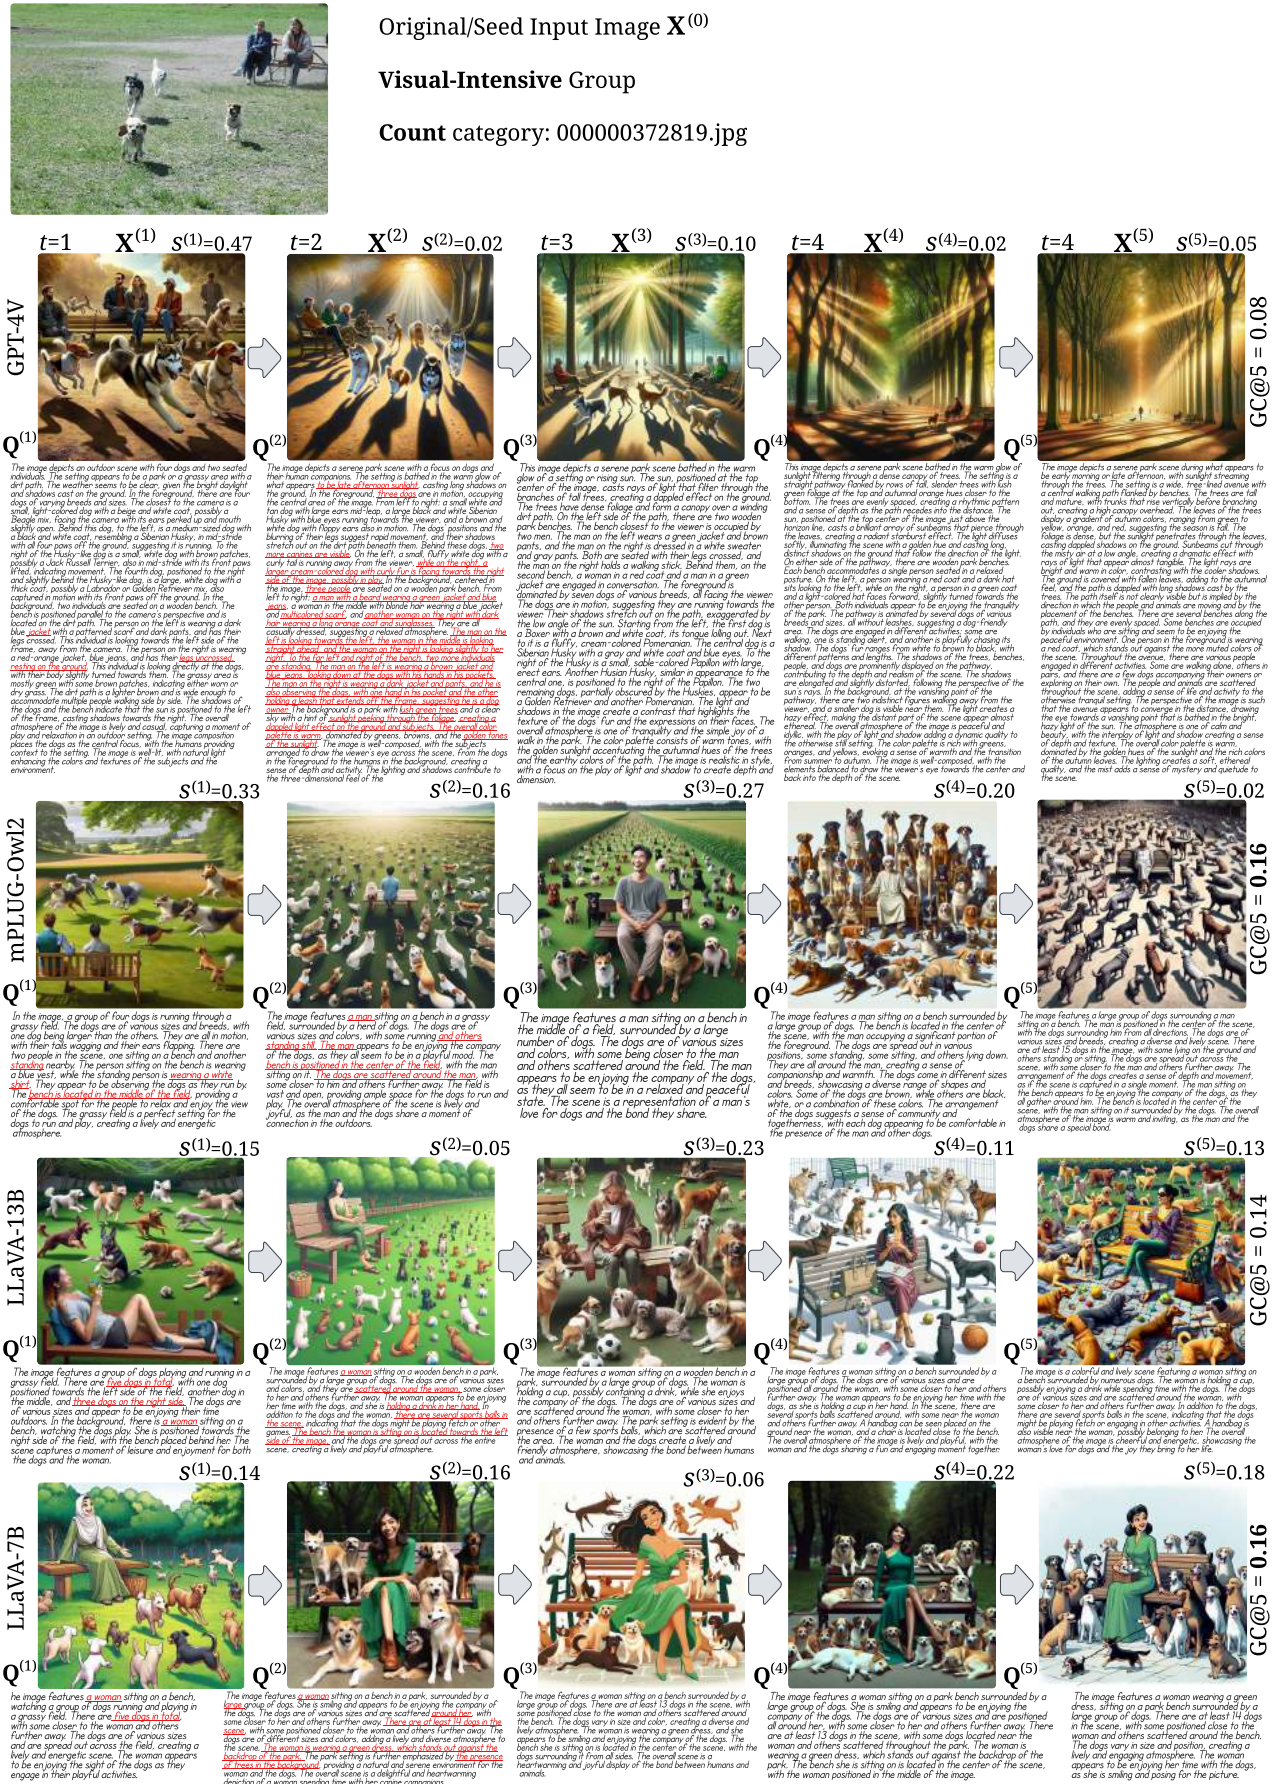

Figure 5: Illustration of a 5-iteration GenCeptrion procedure run on count images to evaluate 4 VLLMs. Each iteration  $t$  shows the generated image  $X^{(t)}$ , the description  $Q^{(t)}$  of the preceding image  $X^{(t-1)}$ , and the similarity score  $s^{(t)}$  relative to  $X^{(0)}$ . The GC@5 metric for each VLLM is also presented. Hallucinated elements within descriptions  $Q^{(1)}$  and  $Q^{(2)}$  as compared to the seed image are indicated with **red underlining**.

Original/Seed Input Image  $X^{(0)}$

Visual-Intensive Group

Existence category: 000000010363.jpg

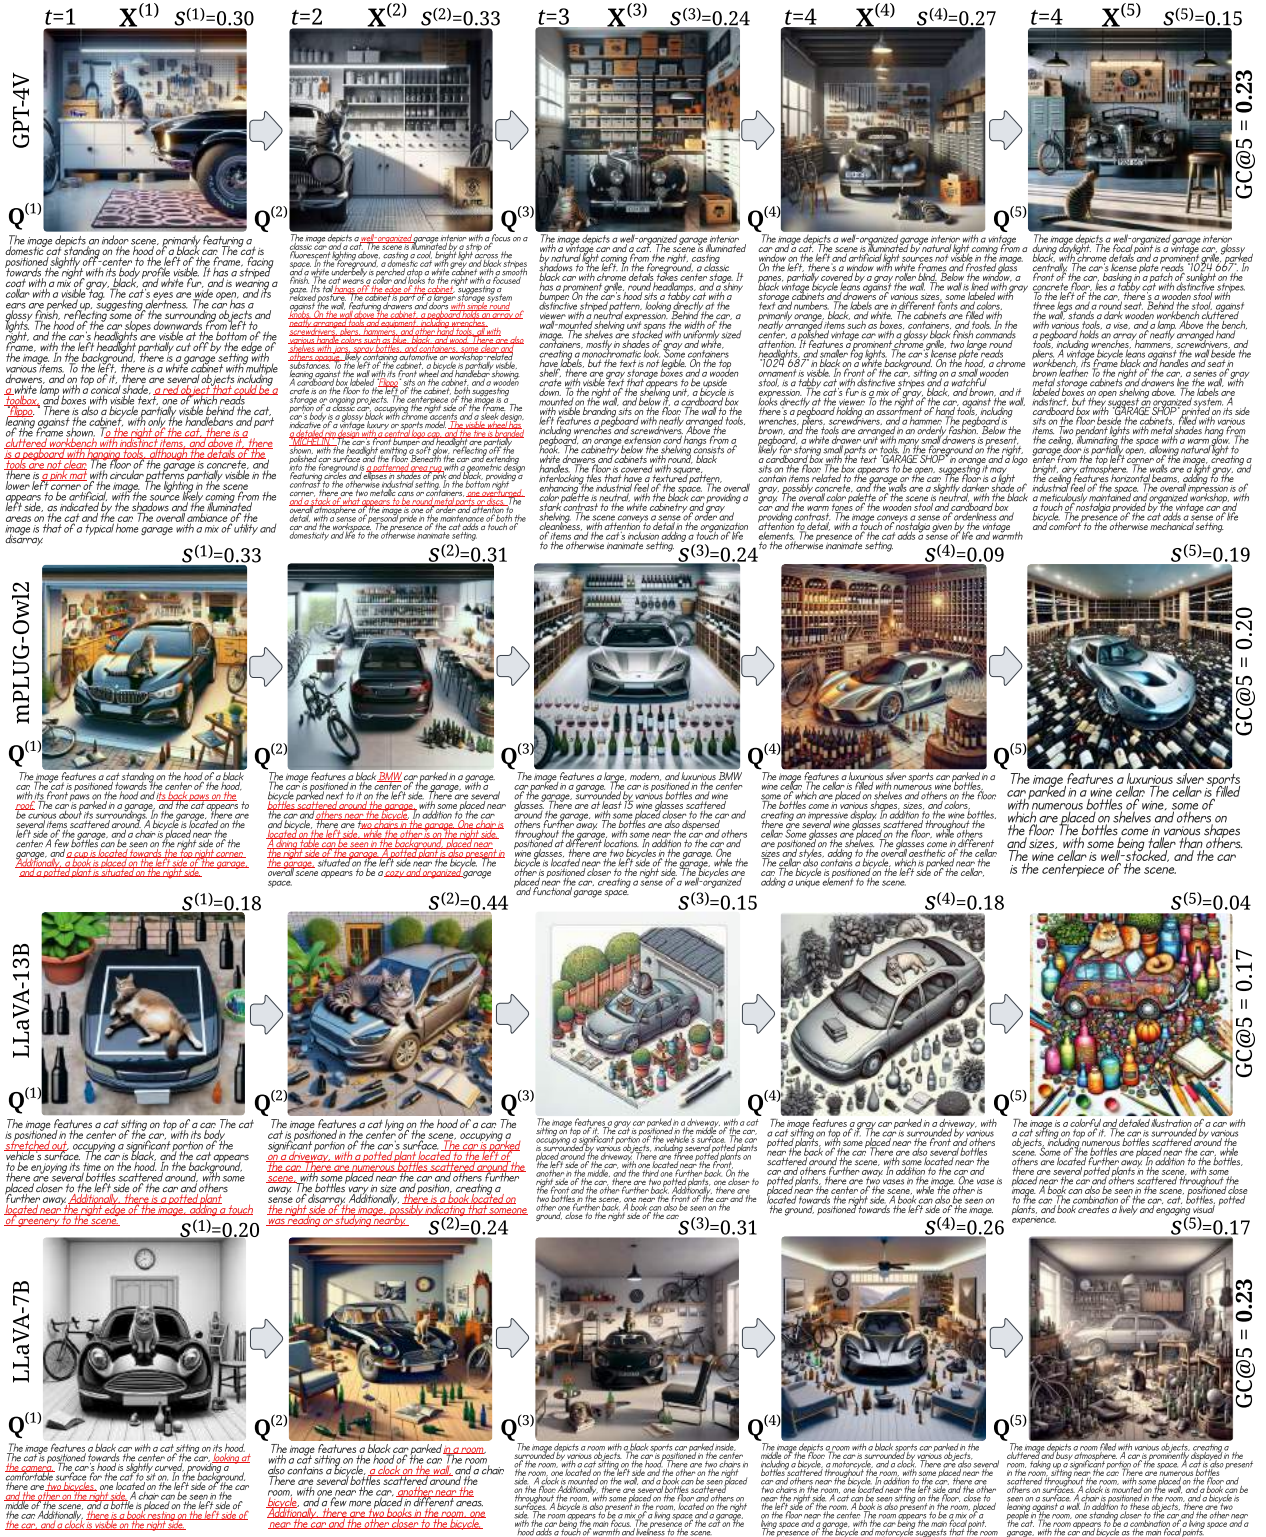

Figure 6: Illustration of a 5-iteration GenCception procedure run on existence images to evaluate 4 VLLMs. Each iteration  $t$  shows the generated image  $X^{(t)}$ , the description  $Q^{(t)}$  of the preceding image  $X^{(t-1)}$ , and the similarity score  $s^{(t)}$  relative to  $X^{(0)}$ . The GC@5 metric for each VLLM is also presented. Hallucinated elements within descriptions  $Q^{(1)}$  and  $Q^{(2)}$  as compared to the seed image are indicated with red underlining.

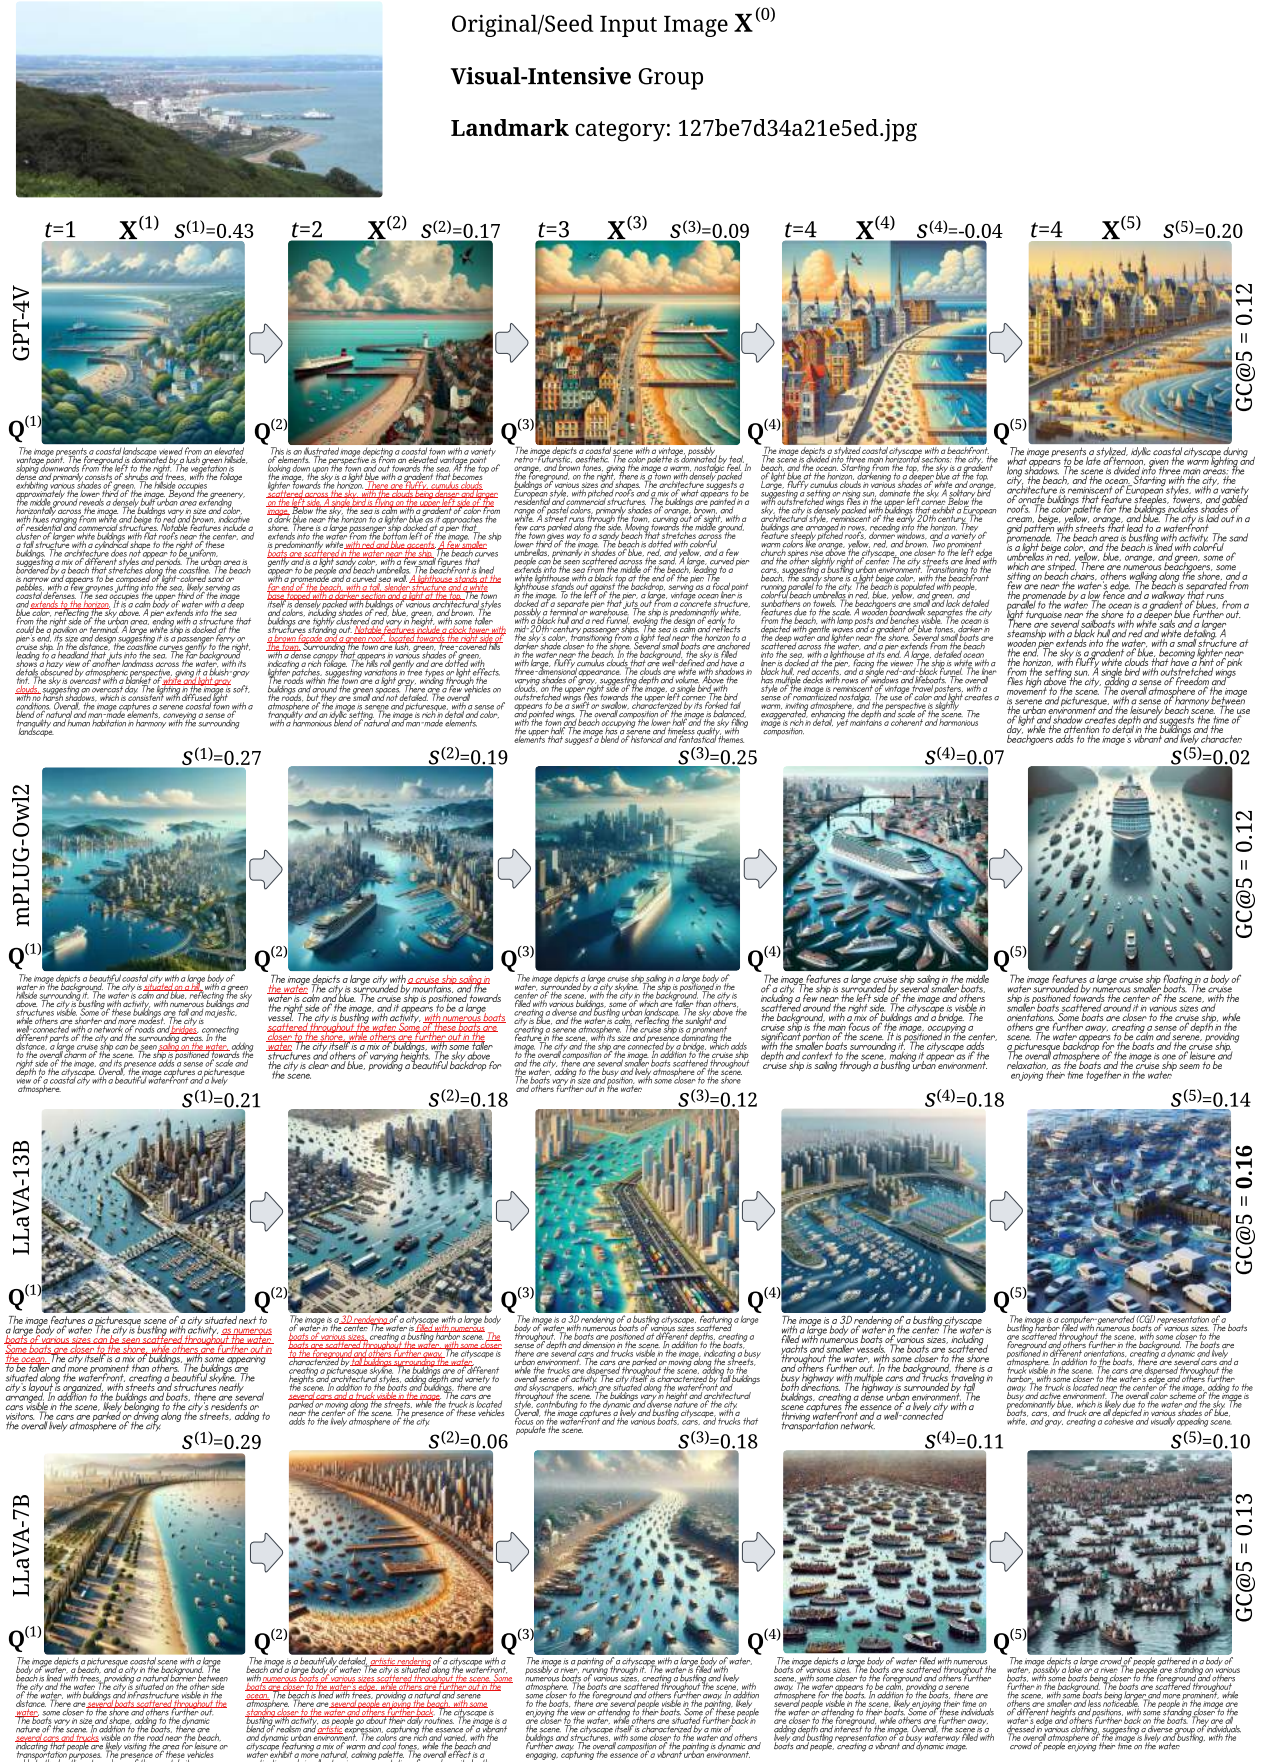

Figure 7: Illustration of a 5-iteration GenCception procedure run on landmark images to evaluate 4 VLLMs. Each iteration  $t$  shows the generated image  $\mathbf{X}^{(t)}$ , the description  $\mathbf{Q}^{(t)}$  of the preceding image  $\mathbf{X}^{(t-1)}$ , and the similarity score  $s^{(t)}$  relative to  $\mathbf{X}^{(0)}$ . The GC@5 metric for each VLLM is also presented. Hallucinated elements within descriptions  $\mathbf{Q}^{(1)}$  and  $\mathbf{Q}^{(2)}$  as compared to the seed image are indicated with red underlining.

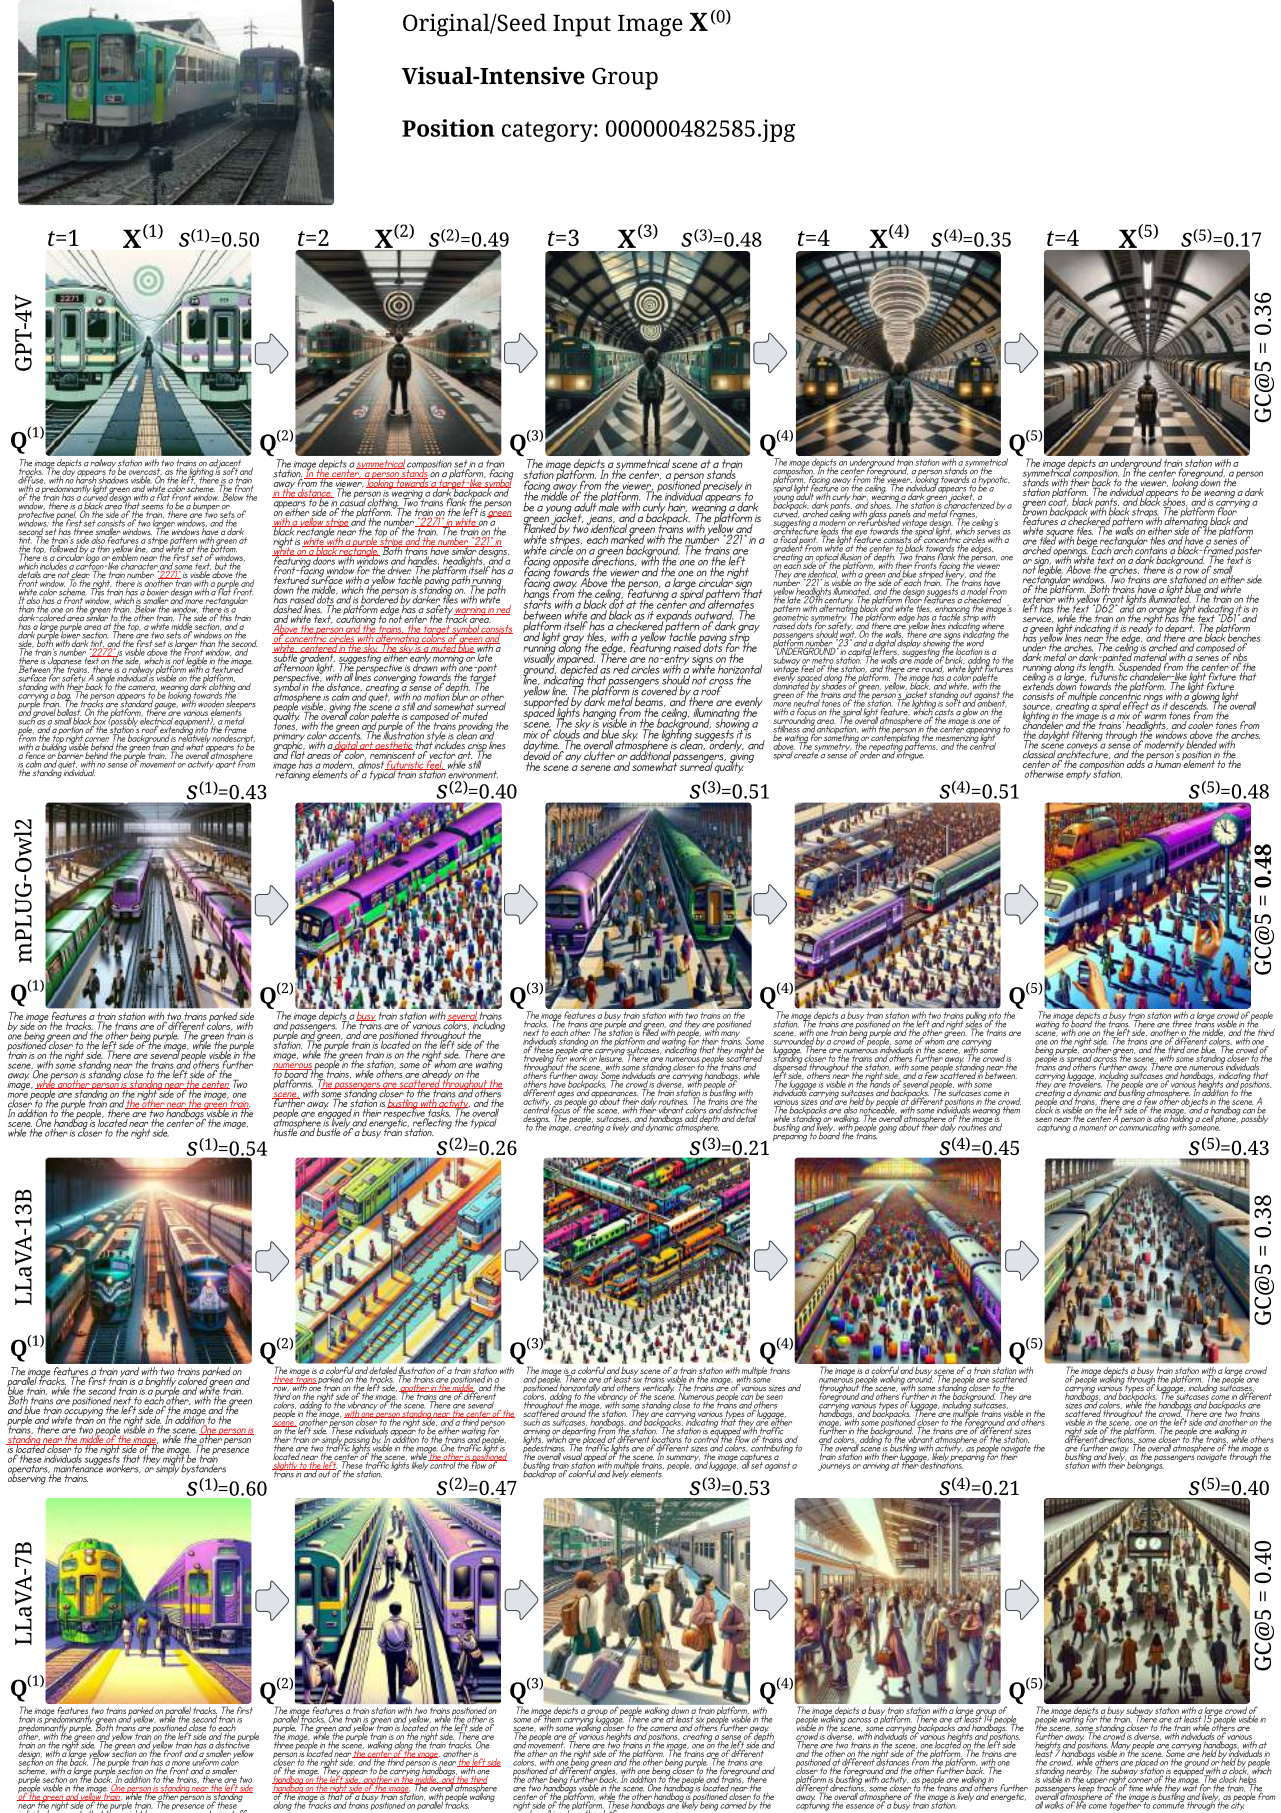

Figure 8: Illustration of a 5-iteration GenCepcion procedure run on position images to evaluate 4 VLLMs. Each iteration  $t$  shows the generated image  $X^{(t)}$ , the description  $Q^{(t)}$  of the preceding image  $X^{(t-1)}$ , and the similarity score  $s^{(t)}$  relative to  $X^{(t-1)}$ . The GC@5 metric for each VLLM is also presented. Hallucinated elements within descriptions  $Q^{(1)}$  and  $Q^{(2)}$  as compared to the seed image are indicated with red underlining.

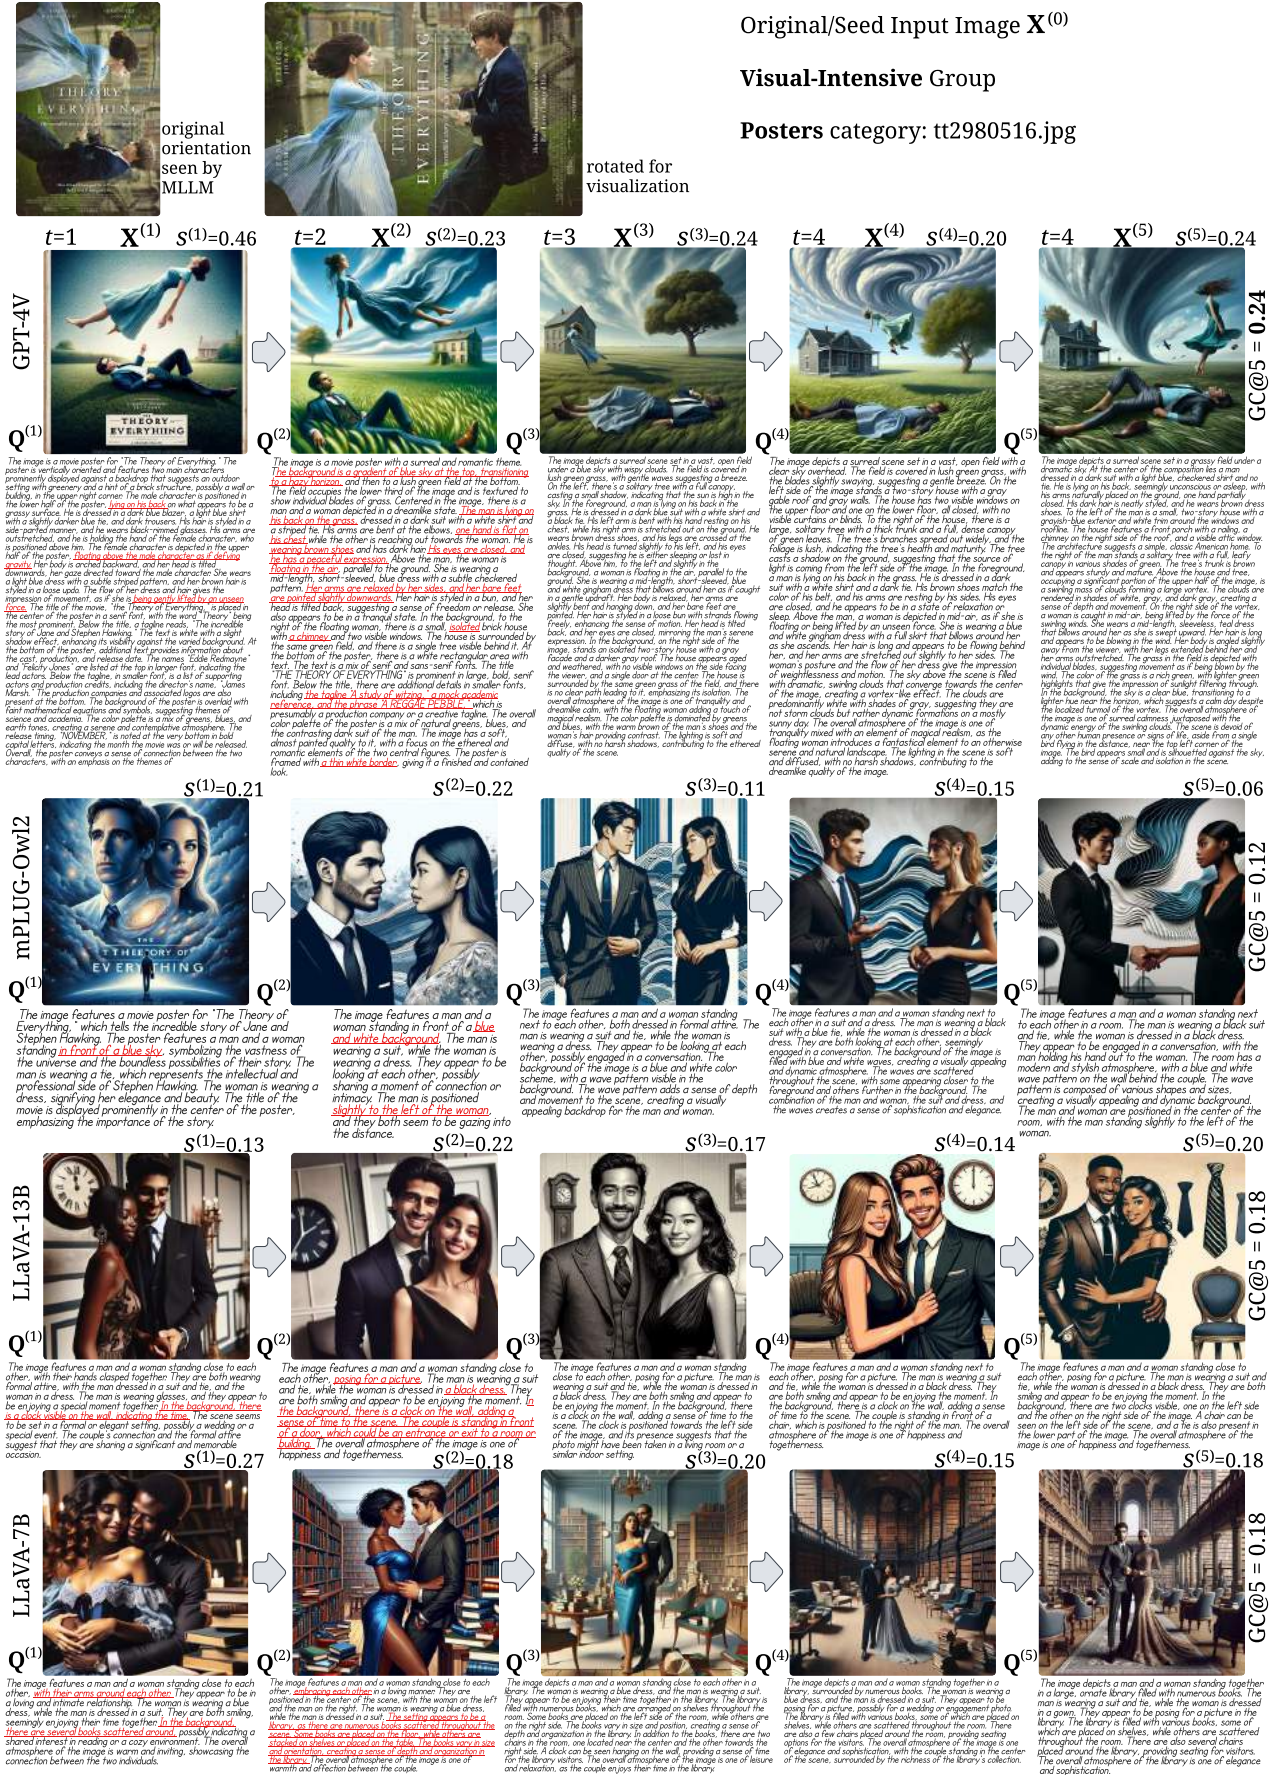

Figure 9: Illustration of a 5-iteration GenCception procedure run on poster images to evaluate 4 VLLMs. Each iteration  $t$  shows the generated image  $X^{(t)}$ , the description  $Q^{(t)}$  of the preceding image  $X^{(t-1)}$ , and the similarity score  $s^{(t)}$  relative to  $X^{(0)}$ . The GC@5 metric for each VLLM is also presented. Hallucinated elements within descriptions  $Q^{(1)}$  and  $Q^{(2)}$  as compared to the seed image are indicated with **red underlining**.

**Scene** category: Places365\_val\_00000180.jpg

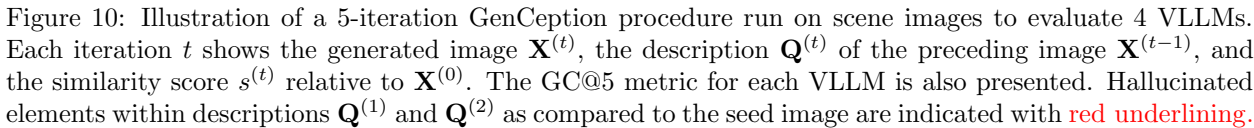

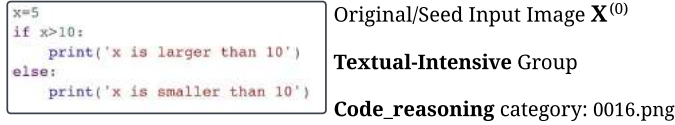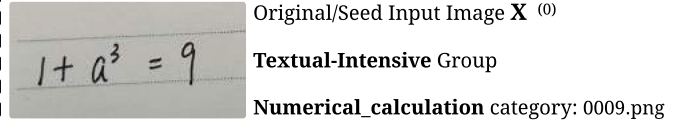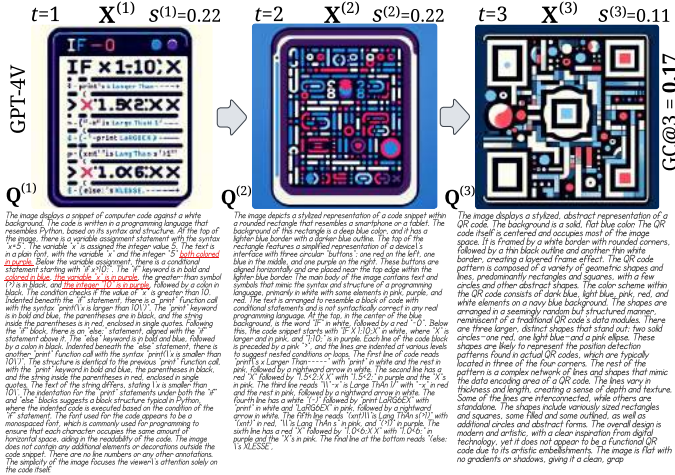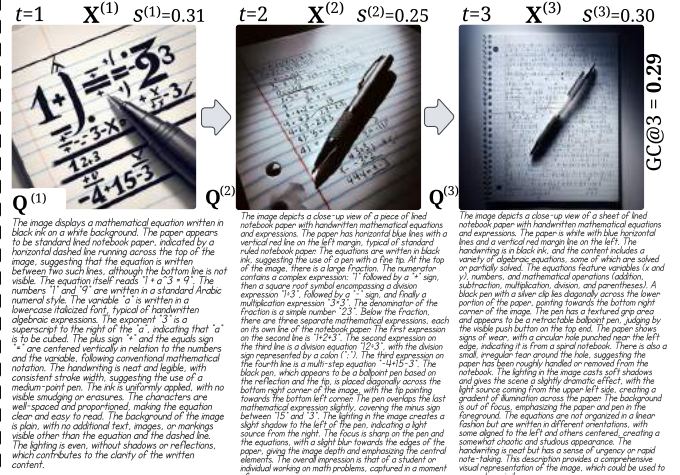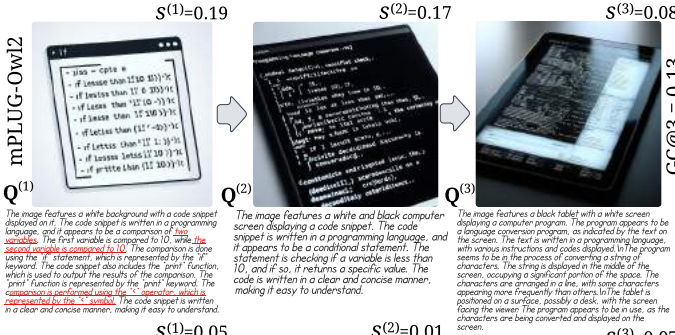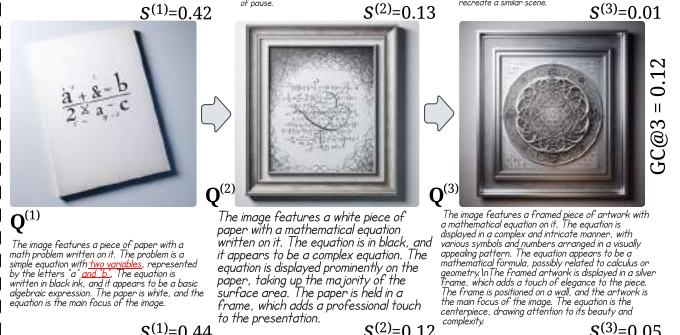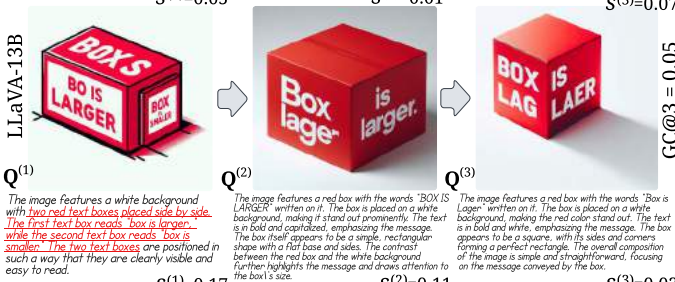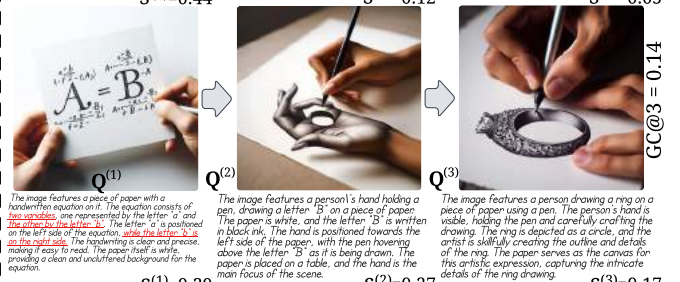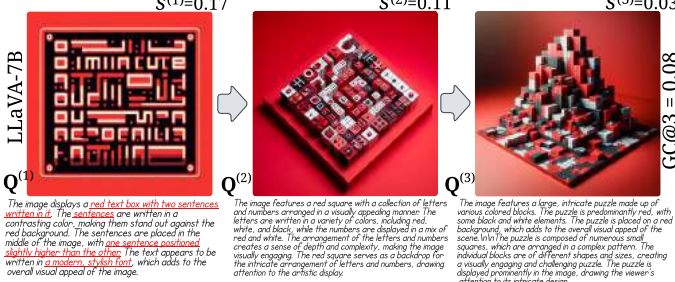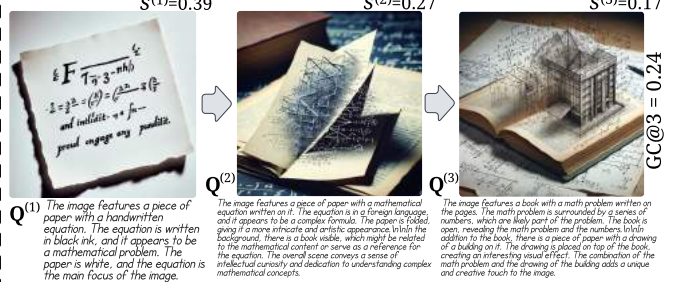

Figure 11: Illustration of a 3-iteration GenCception procedure run on code\_reasoning (left) and numerical\_calculation (right) images to evaluate 4 VLLMs. Each iteration  $t$  shows the generated image  $X^{(t)}$ , the description  $Q^{(t)}$  of the preceding image  $X^{(t-1)}$ , and the similarity score  $s^{(t)}$  relative to  $X^{(0)}$ . The GC@3 metric for each VLLM is also presented. Hallucinated parts within descriptions  $Q^{(1)}$  as compared to the seed image are indicated with **red underlining**.

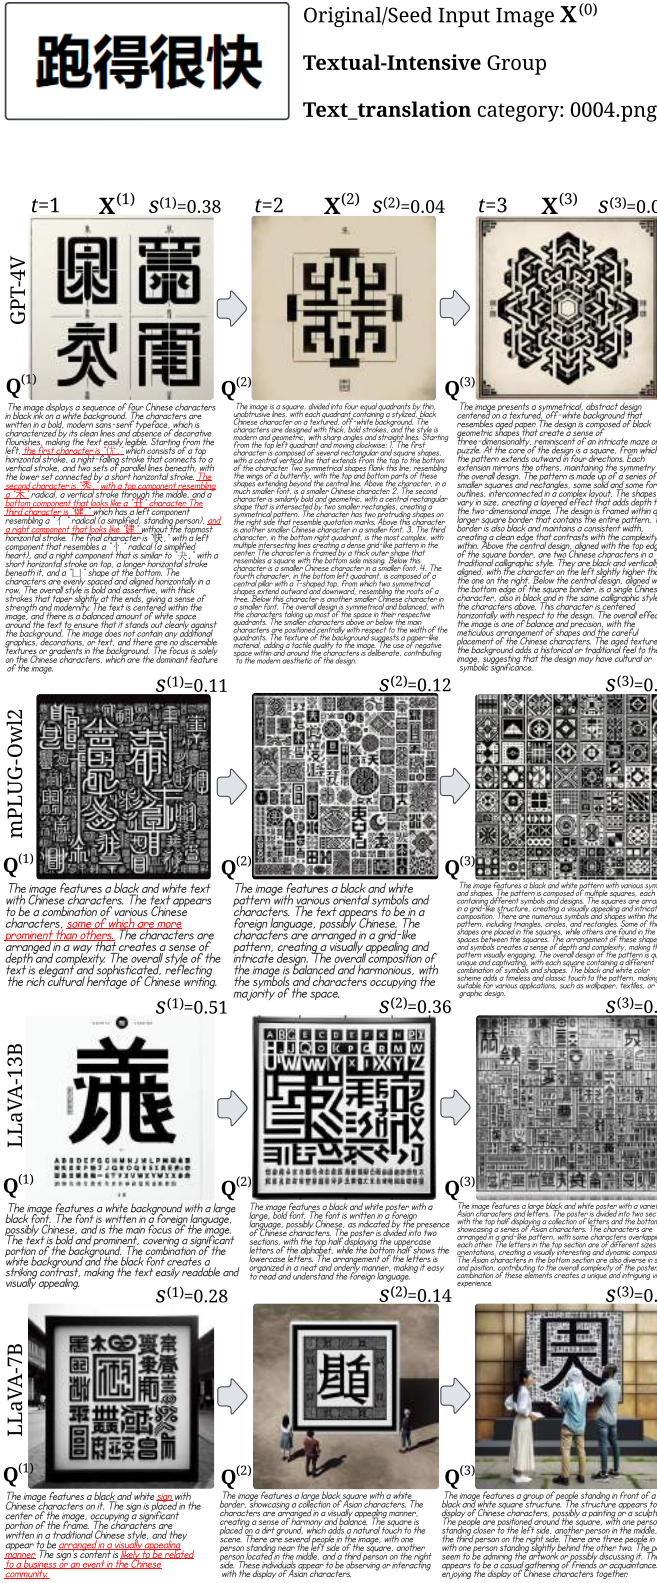

$t=1$

$X^{(1)}$

$s^{(1)}=0.51$

LLaVA-7B

$Q^{(1)}$

The image features a black and white text with Chinese characters. The text is arranged in a way that is both aesthetically pleasing and easy to read. The characters are written in a bold, modern sans-serif style, which is characterized by its clean lines and absence of decorative flourishes, making the text easily legible. Starting from the left, the first character is '跑' (pǎo), which consists of a top horizontal stroke, a left vertical stroke, and two sets of parallel lines beneath, with the lower set connected by a short horizontal stroke. The second character is '得' (de), with a central vertical stroke that extends from the top to the bottom, and a horizontal stroke that connects the two vertical strokes. The third character is '很' (hěn), with a central vertical stroke that extends from the top to the bottom, and a horizontal stroke that connects the two vertical strokes. The fourth character is '快' (kuài), with a central vertical stroke that extends from the top to the bottom, and a horizontal stroke that connects the two vertical strokes.

$t=2$

$X^{(2)}$

$s^{(2)}=0.14$

LLaVA-7B

$Q^{(2)}$

The image features a large black square with a white border. The border is composed of a series of small, repeating patterns that create a sense of depth and complexity. The overall style of the text is elegant and sophisticated, reflecting the rich cultural heritage of Chinese writing.

$t=3$

$X^{(3)}$

$s^{(3)}=0.16$

LLaVA-7B

$Q^{(3)}$

The image features a group of people standing in front of a large black and white square. The people are arranged in a way that is both aesthetically pleasing and easy to read. The characters are written in a bold, modern sans-serif style, which is characterized by its clean lines and absence of decorative flourishes, making the text easily legible. Starting from the left, the first character is '跑' (pǎo), which consists of a top horizontal stroke, a left vertical stroke, and two sets of parallel lines beneath, with the lower set connected by a short horizontal stroke. The second character is '得' (de), with a central vertical stroke that extends from the top to the bottom, and a horizontal stroke that connects the two vertical strokes. The third character is '很' (hěn), with a central vertical stroke that extends from the top to the bottom, and a horizontal stroke that connects the two vertical strokes. The fourth character is '快' (kuài), with a central vertical stroke that extends from the top to the bottom, and a horizontal stroke that connects the two vertical strokes.

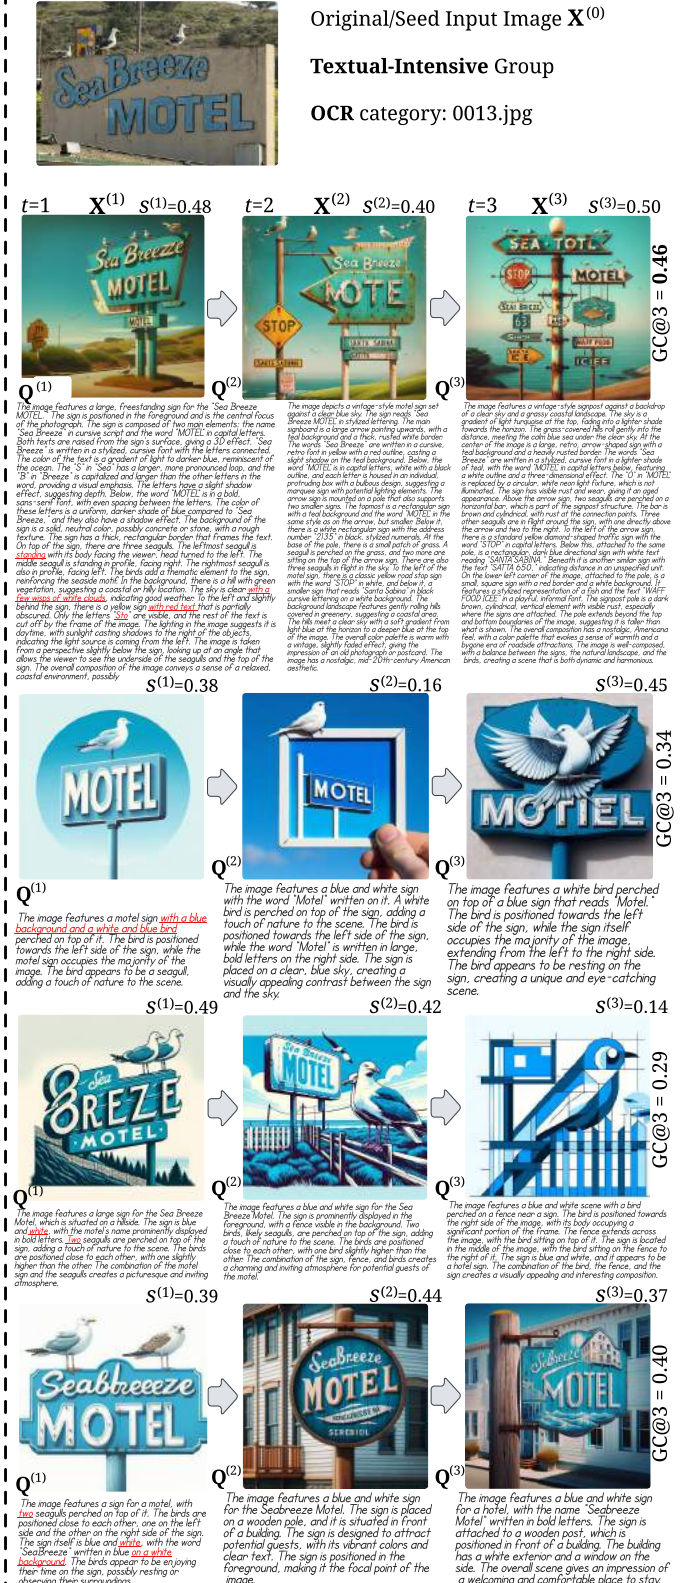

$t=1$

$X^{(1)}$

$s^{(1)}=0.48$

GPT-4V

$Q^{(1)}$

The image features a large, freestanding sign for the Sea Breeze MOTEL. The sign is positioned in the foreground and is the central focus of the photograph. The sign is composed of two main elements: the name 'Sea Breeze' in a cursive script and the word 'MOTEL' in a bold, sans-serif font. The sign is illuminated at night, with the letters glowing against a dark background. The sign is also surrounded by other elements, such as a 'STOP' sign and a 'ONE WAY' sign, which are also illuminated.

$t=2$

$X^{(2)}$

$s^{(2)}=0.40$

mPLUG-Owl2

$Q^{(2)}$

The image features a large, freestanding sign for the Sea Breeze MOTEL. The sign is positioned in the foreground and is the central focus of the photograph. The sign is composed of two main elements: the name 'Sea Breeze' in a cursive script and the word 'MOTEL' in a bold, sans-serif font. The sign is illuminated at night, with the letters glowing against a dark background. The sign is also surrounded by other elements, such as a 'STOP' sign and a 'ONE WAY' sign, which are also illuminated.

$t=3$

$X^{(3)}$

$s^{(3)}=0.50$

mPLUG-Owl2

$Q^{(3)}$

The image features a large, freestanding sign for the Sea Breeze MOTEL. The sign is positioned in the foreground and is the central focus of the photograph. The sign is composed of two main elements: the name 'Sea Breeze' in a cursive script and the word 'MOTEL' in a bold, sans-serif font. The sign is illuminated at night, with the letters glowing against a dark background. The sign is also surrounded by other elements, such as a 'STOP' sign and a 'ONE WAY' sign, which are also illuminated.

$t=1$

$X^{(1)}$

$s^{(1)}=0.38$

mPLUG-Owl2

$Q^{(1)}$

The image features a motel sign with a blue background and white text. The sign is positioned in the foreground and is the central focus of the photograph. The sign is composed of two main elements: the name 'Sea Breeze' in a cursive script and the word 'MOTEL' in a bold, sans-serif font. The sign is illuminated at night, with the letters glowing against a dark background. The sign is also surrounded by other elements, such as a 'STOP' sign and a 'ONE WAY' sign, which are also illuminated.

$t=2$

$X^{(2)}$

$s^{(2)}=0.16$

mPLUG-Owl2

$Q^{(2)}$

The image features a blue and white sign for the Sea Breeze Motel. The sign is positioned in the foreground and is the central focus of the photograph. The sign is composed of two main elements: the name 'Sea Breeze' in a cursive script and the word 'MOTEL' in a bold, sans-serif font. The sign is illuminated at night, with the letters glowing against a dark background. The sign is also surrounded by other elements, such as a 'STOP' sign and a 'ONE WAY' sign, which are also illuminated.

$t=3$

$X^{(3)}$

$s^{(3)}=0.45$

mPLUG-Owl2

$Q^{(3)}$

The image features a blue and white sign for the Sea Breeze Motel. The sign is positioned in the foreground and is the central focus of the photograph. The sign is composed of two main elements: the name 'Sea Breeze' in a cursive script and the word 'MOTEL' in a bold, sans-serif font. The sign is illuminated at night, with the letters glowing against a dark background. The sign is also surrounded by other elements, such as a 'STOP' sign and a 'ONE WAY' sign, which are also illuminated.

Figure 12: Illustration of a 3-iteration GenCeptrion procedure run on text.translation (left) and OCR (right) images to evaluate 4 VLLMs. Each iteration  $t$  shows the generated image  $X^{(t)}$ , and the description  $Q^{(t)}$  of the preceding image  $X^{(t-1)}$ , and the similarity score  $s^{(t)}$  relative to  $X^{(0)}$ . The GC@3 metric for each VLLM is also presented. Hallucinated parts within descriptions  $Q^{(1)}$  as compared to the seed image are indicated with red underlining.
